# Supplementary material for: Myocardial Infarction Promoted the Contrast-Induced Nephropathy by Renal Injury
Source: Preprints.org preprint supplement (doi:10.20944/preprints201611.0108.v1), 2016-11-21
Supplement: Supplementary file 2 [file supplementary]

| Table 1 Biomarkers of renal function | | | |
| --- | --- | --- | --- |
| Variable | Non-PMN group | PMN group | P value |
| Pre-Scr (mmol/L) | 77.7±18.8 | 87.5±34.2 | 0.12 |
| Pre-eGFR (ml/min) | 91.8±20.2 | 85.0±25.1 | 0.032 |
| Post-Scr (mmol/L) | 80.7±18.9 | 94.2±43.6 | 0.015 |
| Post-eGFR (ml/min) | 87.8±19.3 | 79.0±24.2 | 0.004 |
| CI-AKI | 16/274 (5.8%) | 11/53 (20.8%) | 0.001 |

Values are given as mean±SD, median (interquartile range), or number of patients with MA or CI-AKI/total patient number (percent).
